# Supplementary figures and images for: Mixing mechanisms of lead nanoparticles with mineral particles: implication of atmospheric transportation of lead
Source: Royal Society of Chemistry journal article supplement (doi:10.1039/d3en00805c), 2024-01-01

MDT

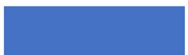

BDT

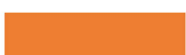

(a)

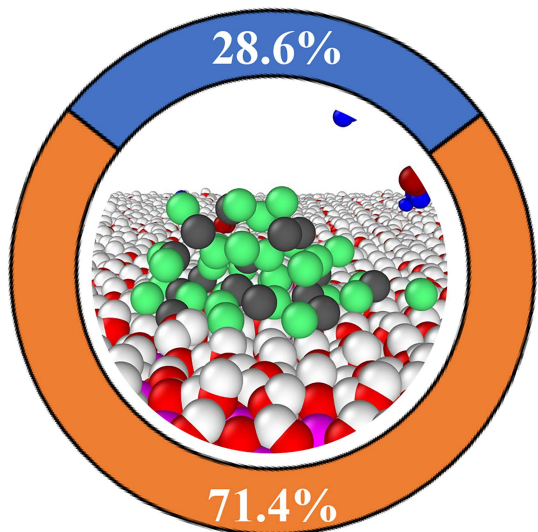

(b)

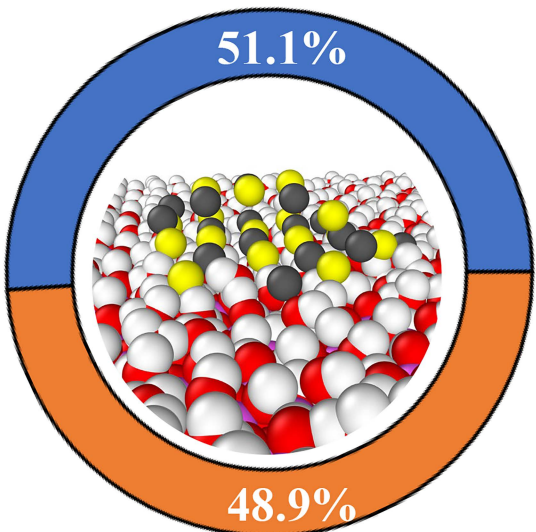

(c)

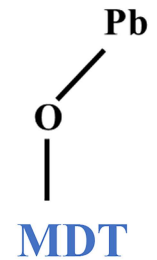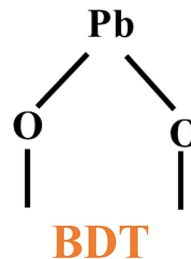

Supplement: d3en00805c4.pdf [file d3en00805c4.pdf]
